# Supplementary material for: Poly-phosphocholination of liposomes leads to highly-extended retention time in mice joints
Source: Royal Society of Chemistry journal article supplement (doi:10.1039/d1tb02346b), 2022-01-01
Supplement: d1tb02346b1.pdf [file d1tb02346b1.pdf]

## Supplementary Information

### Poly-phosphocholination of liposomes leads to highly-extended retention time in mice joints

Weifeng Lin, Ronit Goldberg<sup>1</sup>, and Jacob Klein\*

Department of Materials and Interfaces, Weizmann Institute of Science, Rehovot 76100, Israel

\* jacob.klein@weizmann.ac.il

<sup>1</sup> Present address: Liposphere Ltd., Aarava 1, Givat-Shmuel, 5400804, Israel

#### Synthesis and Characterization of DSPE-PMPC

The ATRP initiator DSPE-2-bromoisobutyrate (DSPE-Br) was prepared as follows: DSPE (4.93 g, 5.6 mmol) was dispersed in dried chloroform (100 mL) with triethylamine (1.4 mL, 11.2 mmol) for 0.5 h at room temperature. BIBB (0.55 mL, 5.6 mmol) was then added dropwise into the mixture. The mixture would form a clear solution gradually, and was stirred for 12 h at 40 °C. The solution was washed with 1 M hydrochloric acid solution (100 mL×3), and pure water (100 mL×3). A white powder was obtained after removing the chloroform using a rotary evaporator (yield: 96%). DSPE-PMPC was synthesized using atom transfer radical polymerization (ATRP). DSPE-Br (1.26 g, 1.4 mmol) was dissolved in DCM (8 mL), and MPC (1.94 g, 6.58 mmol) was dissolved in ethanol (8 mL). The two solutions were mixed in a round-bottomed flask equipped with a septum and a magnetic stirrer. PMDETA (600 µL, 2.8 mmol) was added and the flask was placed in an oil bath at 40 °C, and degassed with a stream of N<sub>2</sub> for 0.5 h. Then, CuBr (210 mg, 1.4 mmol) was added quickly and the mixture was degassed again for 0.5 h. The solution was stirred overnight at 40 °C. Then, the solution was dialyzed (CelluSep membrane having a molecular weight cut-off value of 1000) against ethanol and water for 48 h, respectively. The polymer DSPE-PMPC was obtained after lyophilization (yield: 51%). <sup>1</sup>H NMR (Bruker AMX-300 NMR spectrometer, 300 MHz, CDCl<sub>3</sub>/CD<sub>3</sub>OD 1:1): chemical shift (ppm): 0.53 (3H, CH<sub>3</sub>-CR-CH<sub>2</sub>-), 0.91 (28H, -(CH<sub>2</sub>)<sub>14</sub>-CH<sub>3</sub>), 1.25 (2H, -CH<sub>2</sub>-CR-CH<sub>3</sub>), 2.94 (9H, -N<sup>+</sup>(CH<sub>3</sub>)<sub>3</sub>), 3.39 (2H, -O-CH<sub>2</sub>-CH<sub>2</sub>-N<sup>+</sup>(CH<sub>3</sub>)<sub>3</sub>), 3.70 (2H, -C-O-CH<sub>2</sub>-), 3.85 (2H, -CH<sub>2</sub>-O-P), 3.95 (2H, -CH<sub>2</sub>-CH<sub>2</sub>-N<sup>+</sup>(CH<sub>3</sub>)<sub>3</sub>).

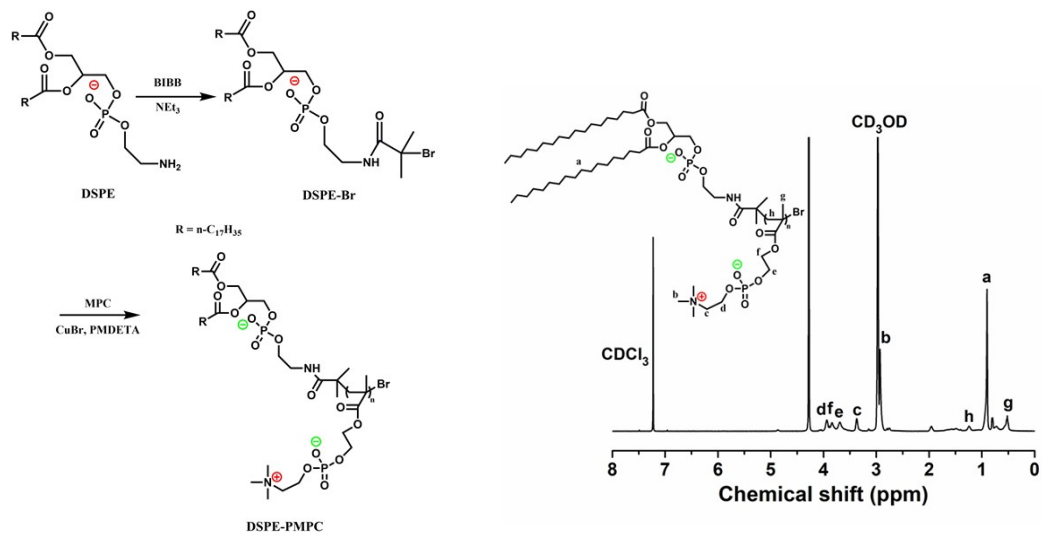

(a)

(b)

Scheme S1. (a) Synthesis procedure of the initiator DSPE-Br and lipid-polymer conjugate DSPE-PMPC; (b) <sup>1</sup>H NMR characterization of DSPE-PMPC in CD<sub>3</sub>OD/CDCl<sub>3</sub> (1:1).
